# Supplementary material for: Silver Nanoparticles Using Eucalyptus or Willow Extracts (AgNPs) as Contact Lens Hydrogel Components to Reduce the Risk of Microbial Infection
Source: MDPI journal article supplement (doi:10.3390/molecules26165022), 2021-08-19
Supplement: s1 [file s1]

# Silver Nanoparticles Using Eucalyptus or Willow Extracts (AgNPs) as Contact Lens Hydrogel Components to Reduce the Risk of Microbial Infection

Andreas K. Rossos <sup>1</sup>, Christina N. Banti <sup>1,\*</sup>, Panagiotis K. Raptis <sup>1</sup>, Christina Papachristodoulou <sup>2</sup>, Ioannis Sainis <sup>3</sup>, Panagiotis Zoumpoulakis <sup>4</sup>, Thomas Mavromoustakos <sup>5</sup> and Sotiris K. Hadjikakou <sup>1,6,\*</sup>

<sup>1</sup> Section of Inorganic and analytical Chemistry, Department of Chemistry, University of Ioannina, 45110 Ioannina, Greece; arossos@uoi.gr (A.K.R.); panagiwtisraptis93@yahoo.gr (P.K.R.)

<sup>2</sup> Department of Physics, University of Ioannina, 45110 Ioannina, Greece; xpapaxri@uoi.gr

<sup>3</sup> Cancer Biobank Center, University of Ioannina, 45110 Ioannina, Greece; isainis@uoi.gr

<sup>4</sup> Laboratory of Chemistry, Analysis and Design of Food Processes, Department of Food Science and Technology, University of West Attica, Egaleo, 12243 Attica, Greece; pzoump@eie.gr

<sup>5</sup> Organic Chemistry Laboratory, Department of Chemistry, University of Athens Greece, 15571 Athens, Greece; tmavrom@chem.uoa.gr

<sup>6</sup> Institute of Materials Science and Computing, University Research Center of Ioannina (URCI), 45110 Ioannina, Greece

\* Correspondence: cbanti@uoi.gr (C.N.B.), shadjika@uoi.gr (S.K.H.); Tel.: +302651008362 (C.N.B.), +302651008374 (S.K.H.)

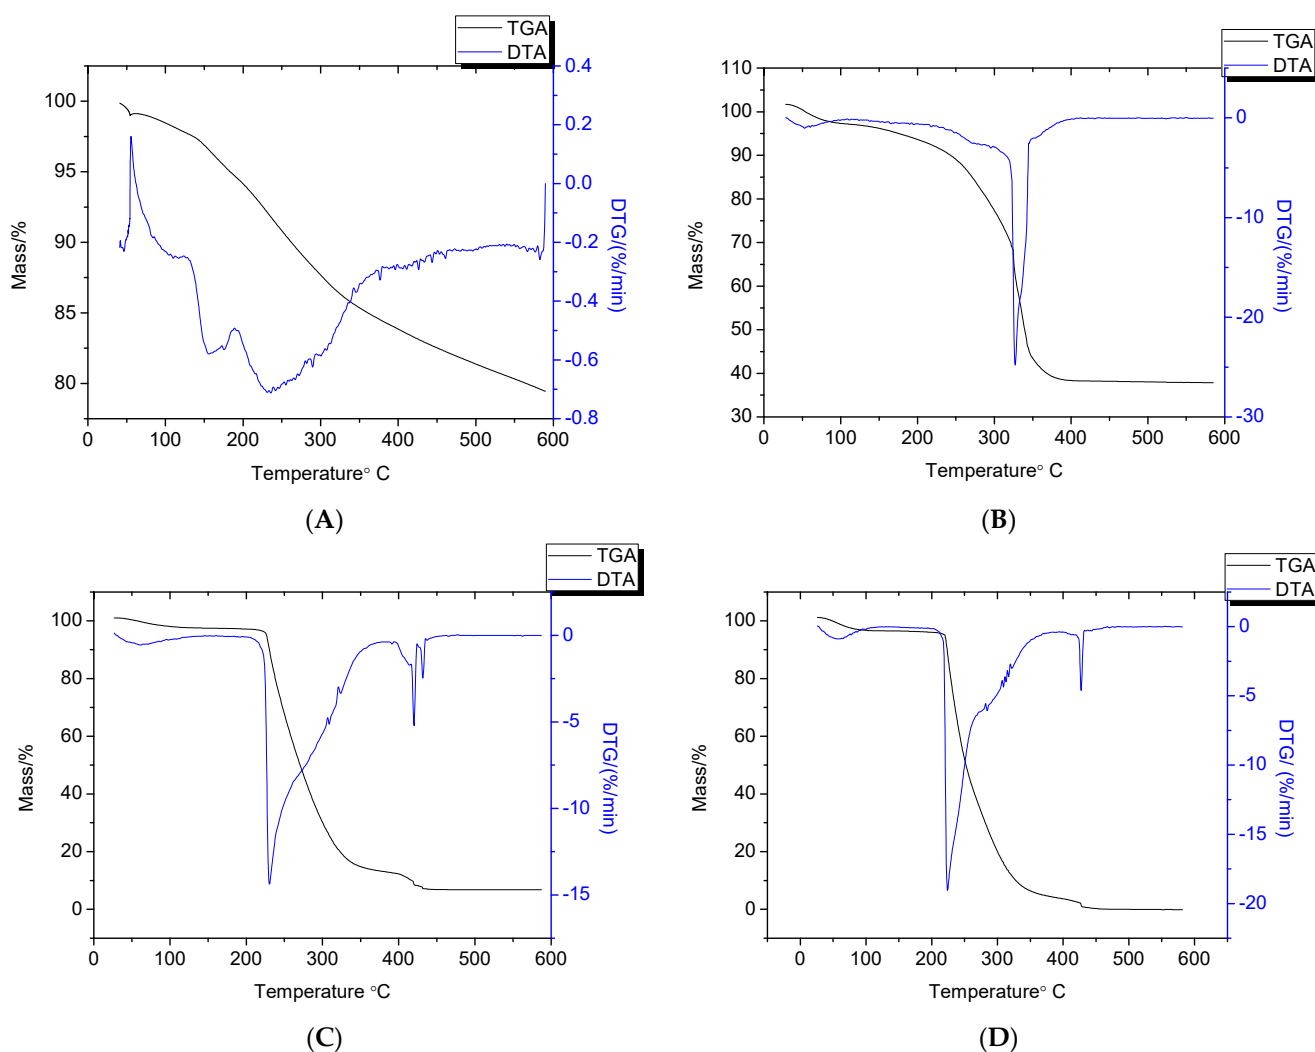

**Figure S1.** TGA diagrams of AgNPs(ELE) (A), AgNPs(WBE) (B), pHEMA@AgNPs(ELE)\_2 (C) and pHEMA@AgNPs(WBE)\_2 (D).

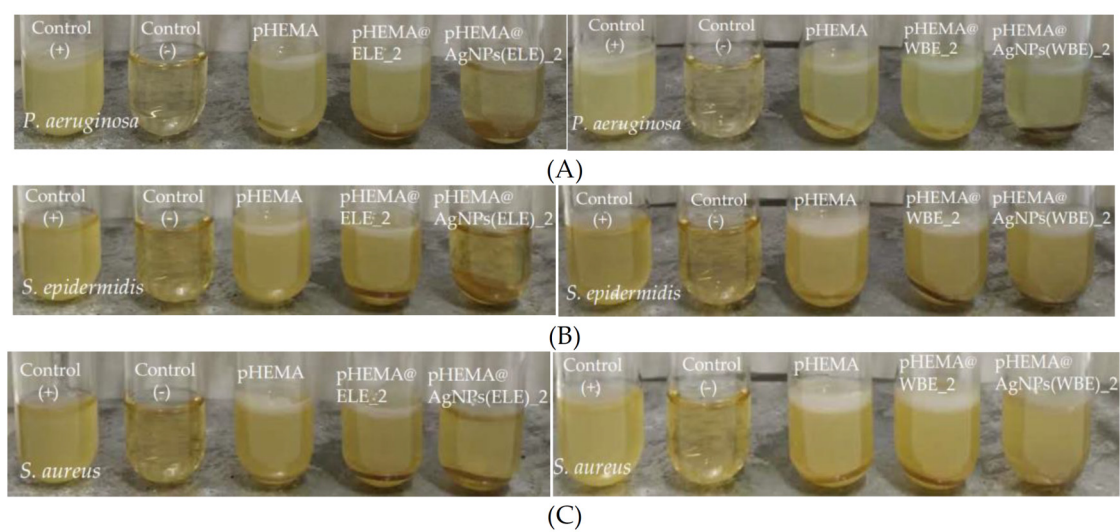

**Figure S2.** Bacteria viability of pHEMA, pHEMA@ELE\_2, pHEMA@AgNPs(ELE)\_2, pHEMA@WBE\_2 and pHEMA@AgNPs(WBE)\_2 against *P. aeruginosa* (A), *S. epidermidis* (B), *S. aureus* (C).
